# Supplementary material for: SHaKTI: Subglacial Hydrology and Kinetic Transient Interactionsv1.0
Source: Copernicus journal article supplement (doi:10.5194/gmd-2018-58), 2018-03-27
Supplement: Supplementary file 1 [file gmd-2018-58-supplement.zip]

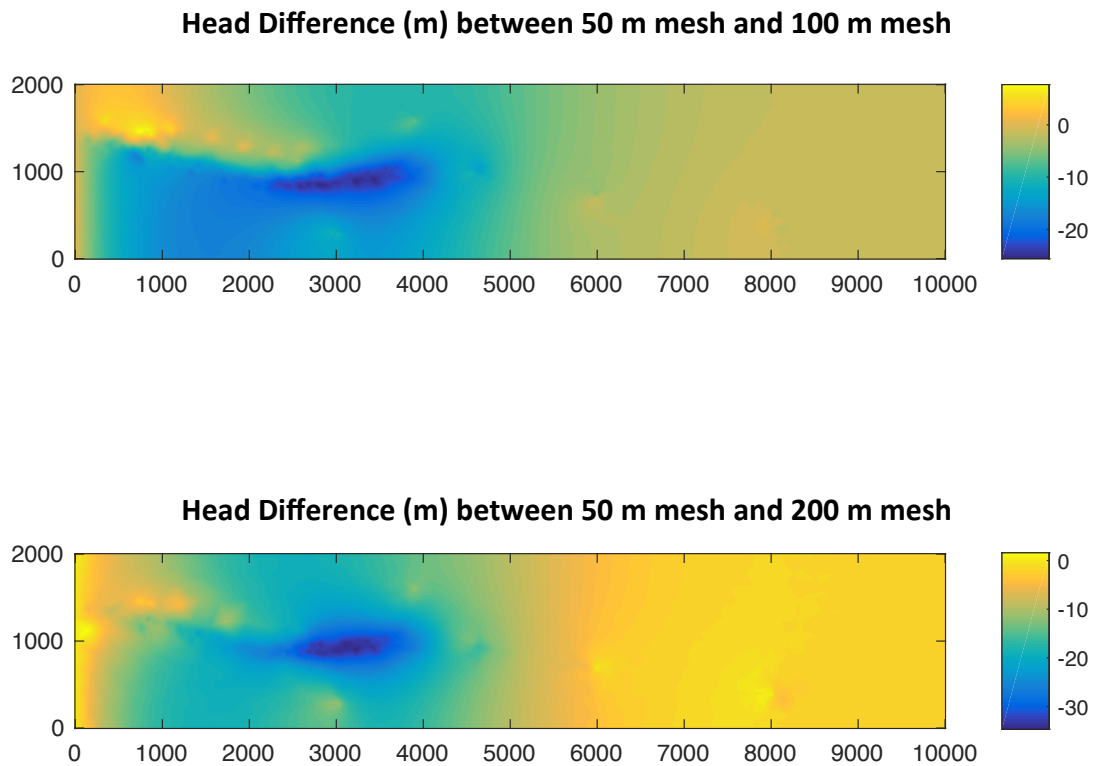

Figure S1. Difference in hydraulic head interpolated onto a common grid from the unstructured meshes with typical element sizes as shown in Fig. 3 of the main paper.
